# Supplementary material for: The extensive m5C epitranscriptome of Thermococcus kodakarensis is generated by a suite of RNA methyltransferases that support thermophily
Source: PubMed Central journal article supplement — Nat Commun. 2024 Aug 23;15:7272. doi: 10.1038/s41467-024-51410-w (PMC11344067; doi:10.1038/s41467-024-51410-w), 2024-08-23
Supplement: 41467_2024_51410_MOESM3_ESM.pdf [file 41467_2024_51410_MOESM3_ESM.pdf]

## Description of Additional Supplementary Files

**File Name: Supplementary Data 1** | Mass spectrometry data represented in supplementary figure 1b.

**File Name: Supplementary Data 2** | Mass spectrometry data represented in supplementary figure 1c.

**File Name: Supplementary Data 3** | The genomic coordinates and complete annotation of each m<sup>5</sup>C site. These data are represented in tables 1, table 2, supplementary table 1, figure 1 a-c and e-g, figure 3 a-c, figure 4 a-c and i-k, supplementary figure 2 b-e, supplementary figure 3 a-b, supplementary figure 4 a-c and e-g, supplementary figure 6, supplementary figure 9 a-d parts I-III.

**File Name: Supplementary Data 4** | Complete analysis of positional bias of m<sup>5</sup>C sites in each codon and amino acid context. These data are represented in figure 1 h-l and supplementary figure 4 h-l.

**File Name: Supplementary Data 5** | The m<sup>5</sup>C modification frequency at high confidence and reproducible m<sup>5</sup>C sites in ribosomal RNA across all strains. These data are represented in figure 3.

**File Name: Supplementary Data 6** | Mass spectrometry data represented in figure 4 f and g.

**File Name: Supplementary Data 7** | Mass spectrometry analysis represented in supplementary figure 8.
